# Supplementary material for: Plasmonic Mo-doped HNb3O8 nanosheets with tunable energy band structures for photothermal catalytic H2 evolution in the full solar spectrum
Source: Royal Society of Chemistry journal article supplement (doi:10.1039/d4ta06164k), 2024-01-01
Supplement: d4ta06164k1.pdf [file d4ta06164k1.pdf]

**Plasmonic Mo-doped HNb<sub>3</sub>O<sub>8</sub> nanosheets with tunable energy band structures  
for photothermal catalytic H<sub>2</sub> evolution in Full Solar Spectrum**

Junli Chen,<sup>a\*</sup> Xinyi Jin<sup>a</sup>, Xinli Yang,<sup>b</sup> Lei deng,<sup>b</sup> Zhiqiang Zhang,<sup>a</sup> Lifeng Han,<sup>a</sup>

Feilong Gong,<sup>a</sup> Yonghui Zhang<sup>a\*</sup>

<sup>a</sup>School of Materials and Chemical Engineering, Collaborative Innovation Center of Environmental Pollution Control and Ecological Restoration, Zhengzhou University of Light Industry, Zhengzhou 450001, China.

<sup>b</sup>College of Chemistry, Chemical and Environmental Engineering, Henan University of Technology, Zhengzhou 450000, China

\*Corresponding Author. Tel/Fax: +86-371-8660 9676.

E-mail: chenjunli@zzuli.edu.cn, [yonghui.zhang@zzuli.edu.cn](mailto:yonghui.zhang@zzuli.edu.cn)

Table S1. Atomic compositions of Mo-doped HNb<sub>3</sub>O<sub>8</sub>.

| Catalysts                       | At. Comp. <sup>a</sup>                            | At. Comp. <sup>b</sup> | At. Comp. [wt%] <sup>c</sup> |      |                                                   |
|---------------------------------|---------------------------------------------------|------------------------|------------------------------|------|---------------------------------------------------|
|                                 | $n_{\text{Mo}}/(n_{\text{Mo}}+n_{\text{Nb}})$ (%) | (%)                    | Mo                           | Nb   | $n_{\text{Mo}}/(n_{\text{Mo}}+n_{\text{Nb}})$ (%) |
| HNb <sub>3</sub> O <sub>8</sub> | 0.00                                              | 0.00                   | 0.00                         | 66.4 | 0.00                                              |
| MoNb-1                          | 0.98                                              | -                      | 0.7                          | 65.3 | 1.04                                              |
| MoNb-5                          | 4.96                                              | 4.91                   | 3.4                          | 64.8 | 4.84                                              |
| MoNb-10                         | 9.87                                              | 9.82                   | 7.0                          | 61.4 | 9.94                                              |
| MoNb-15                         | 14.6                                              | 14.8                   | 10.5                         | 57.9 | 14.9                                              |

<sup>a</sup>Mole content of Mo calculated by EDX.

<sup>b</sup>Surficial content of Mo calculated by XPS.

<sup>c</sup>Measured by ICP.

Table S2 Free-carrier densities of HNb<sub>3</sub>O<sub>8</sub> and Mo-doped HNb<sub>3</sub>O<sub>8</sub>.

| Catalysts                       | LSPR peak |      | Free-carrier density [cm <sup>-3</sup> ] |                       |
|---------------------------------|-----------|------|------------------------------------------|-----------------------|
|                                 | [nm]      |      | a                                        | b                     |
| HNb <sub>3</sub> O <sub>8</sub> | -         | -    | -                                        | -                     |
| MoNb-1                          | 473       | 1005 | 4.00×10 <sup>22</sup>                    | 1.12×10 <sup>22</sup> |
| MoNb-5                          | 432       | 952  | 4.42×10 <sup>22</sup>                    | 1.20×10 <sup>22</sup> |
| MoNb-10                         | 416       | 952  | 4.50×10 <sup>22</sup>                    | 2.90×10 <sup>22</sup> |
| MoNb-15                         | 407       | 889  | 5.67×10 <sup>22</sup>                    | 2.01×10 <sup>22</sup> |

<sup>a</sup> calculated by LSPR peak at about 400 nm

<sup>b</sup> calculated by LSPR peak at about 900 nm

Table S3 the fitting parameters of the equivalent circuit for HNb<sub>3</sub>O<sub>8</sub> and Mo-doped HNb<sub>3</sub>O<sub>8</sub>.

| Catalysts                       | R <sub>1</sub> | R <sub>2</sub> | CPE1-P | W1-P   |
|---------------------------------|----------------|----------------|--------|--------|
| HNb <sub>3</sub> O <sub>8</sub> | 33.98          | 878.7          | 0.9388 | 0.1899 |
| MoNb-1                          | 41.58          | 429.4          | 0.0136 | 0.1579 |
| MoNb-5                          | 47.75          | 201.0          | 1.009  | 0.1437 |
| MoNb-10                         | 47.14          | 45.34          | 0.8743 | 0.3979 |
| MoNb-15                         | 41.91          | 628.5          | 0.9678 | 0.2308 |

Table S4 Decay parameters of HNb<sub>3</sub>O<sub>8</sub> and Mo-doped HNb<sub>3</sub>O<sub>8</sub>.

| Catalysts                       | A <sub>1</sub> | τ <sub>1</sub> | R <sup>2</sup> |
|---------------------------------|----------------|----------------|----------------|
| HNb <sub>3</sub> O <sub>8</sub> | 583.6          | 0.9060         | 0.9739         |
| MoNb-1                          | 556.9          | 0.6763         | 0.9807         |
| MoNb-5                          | 558.9          | 0.6922         | 0.9772         |
| MoNb-10                         | 542.2          | 0.5463         | 0.9726         |
| MoNb-15                         | 579.0          | 0.7618         | 0.9685         |

Table S5 Photocatalytic H<sub>2</sub> activities of different catalysts and a comparison with other published studies

| Host Materials                                                 | Modified Method     | Dopant/ cocatalysts      | Light source | Activity (unit)                             | Ref  |
|----------------------------------------------------------------|---------------------|--------------------------|--------------|---------------------------------------------|------|
| N, rNb co-doped [Nb <sub>3</sub> O <sub>8</sub> ] <sup>-</sup> |                     | Pt (0.5 wt.%)            | 300 W Xe     | 449.9 μmol g <sup>-1</sup> h <sup>-1</sup>  | [1]  |
|                                                                |                     |                          | 200 W UV     | 589.2 μmol g <sup>-1</sup> h <sup>-1</sup>  |      |
| Cu <sub>0.5</sub> Nb <sub>3</sub> O <sub>8</sub>               | N/A                 | N/A                      | 300 W Xe     | 830.4 μmol g <sup>-1</sup> h <sup>-1</sup>  | [2]  |
| HNb <sub>3</sub> O <sub>8</sub> NSs                            | CuCl <sub>2</sub>   | Cu (0.5wt.%)             | 300 W Xe     | 591 μmol g <sup>-1</sup> h <sup>-1</sup>    | [3]  |
| HNb <sub>0.7</sub> Ta <sub>0.3</sub> WO <sub>6</sub> NSs       | N/A                 | Pt(1.0wt.%)              | 300 W Xe     | 1320.0 μmol g <sup>-1</sup> h <sup>-1</sup> | [4]  |
| hy-Nb-TEOA                                                     | N/A                 | GR, MoS <sub>2</sub>     | 500W UV      | 212 μmol g <sup>-1</sup> h <sup>-1</sup>    | [5]  |
| HNb <sub>3</sub> O <sub>8</sub> NSs                            | N/A                 | Pt (1wt.%)               | 125W Hg      | 600 μmol g <sup>-1</sup> h <sup>-1</sup>    | [6]  |
| HNb <sub>3</sub> O <sub>8</sub>                                | N/A                 | Pt (1wt.%)               | 300 W Xe     | 193 μmol h <sup>-1</sup>                    |      |
| HNb <sub>3</sub> O <sub>8</sub> NSs                            | Ni(OH) <sub>2</sub> | Ni <sup>2+</sup> (1wt.%) | 300 W Xe     | 237.8μL h <sup>-1</sup>                     |      |
| HNb <sub>3</sub> O <sub>8</sub> nanobelts                      | Cu ions             | Pt (1wt.%)               | 300 W Xe     | 2.5 mmol g <sup>-1</sup> h <sup>-1</sup>    | [7]  |
| HSr <sub>2</sub> Nb <sub>3</sub> O <sub>10</sub>               | PtCl <sub>4</sub>   | Pt (1wt.%)               | 300 W Xe     | 530.2 μmol g <sup>-1</sup> h <sup>-1</sup>  | [8]  |
| H <sub>4</sub> Nb <sub>2</sub> O <sub>7</sub>                  | N/A                 | Pt (0.5wt.%)             | UV           | 1240 μmol g <sup>-1</sup> h <sup>-1</sup>   |      |
| D-HNb <sub>3</sub> O <sub>8</sub>                              |                     | Pd (1 wt.%)              | Full         | 3657 μmol g <sup>-1</sup> h <sup>-1</sup>   | [9]  |
|                                                                |                     |                          | Uv-vis       | 180.3 μmol g <sup>-1</sup> h <sup>-1</sup>  | This |
| Mo-doped HNb <sub>3</sub> O <sub>8</sub>                       |                     | Pt (1 wt.%)              | Full         | 220.4 μmol g <sup>-1</sup> h <sup>-1</sup>  | Wor  |
|                                                                |                     |                          | Full         | 6698.7 μmol g <sup>-1</sup> h <sup>-1</sup> | k    |

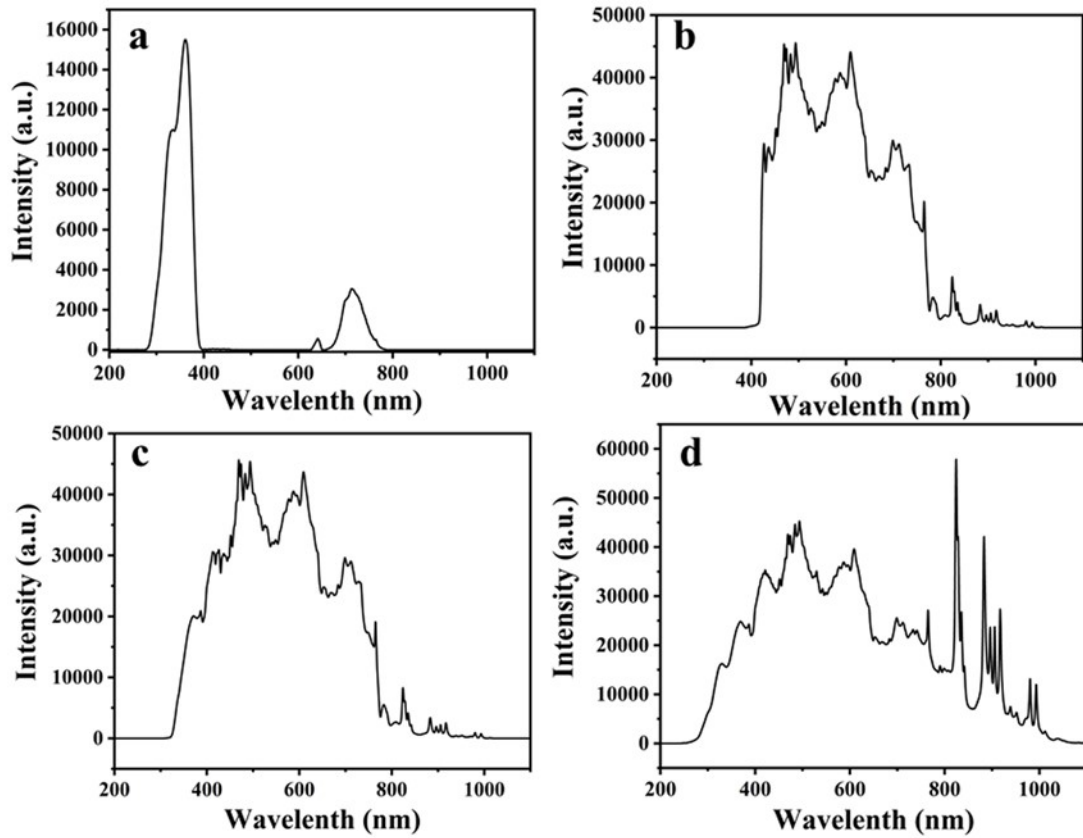

Fig. S1 The spectra of Xenon lamp. (a) Uv, (b) Visible light, (c) Uv-vis, (d) Full spectrum.

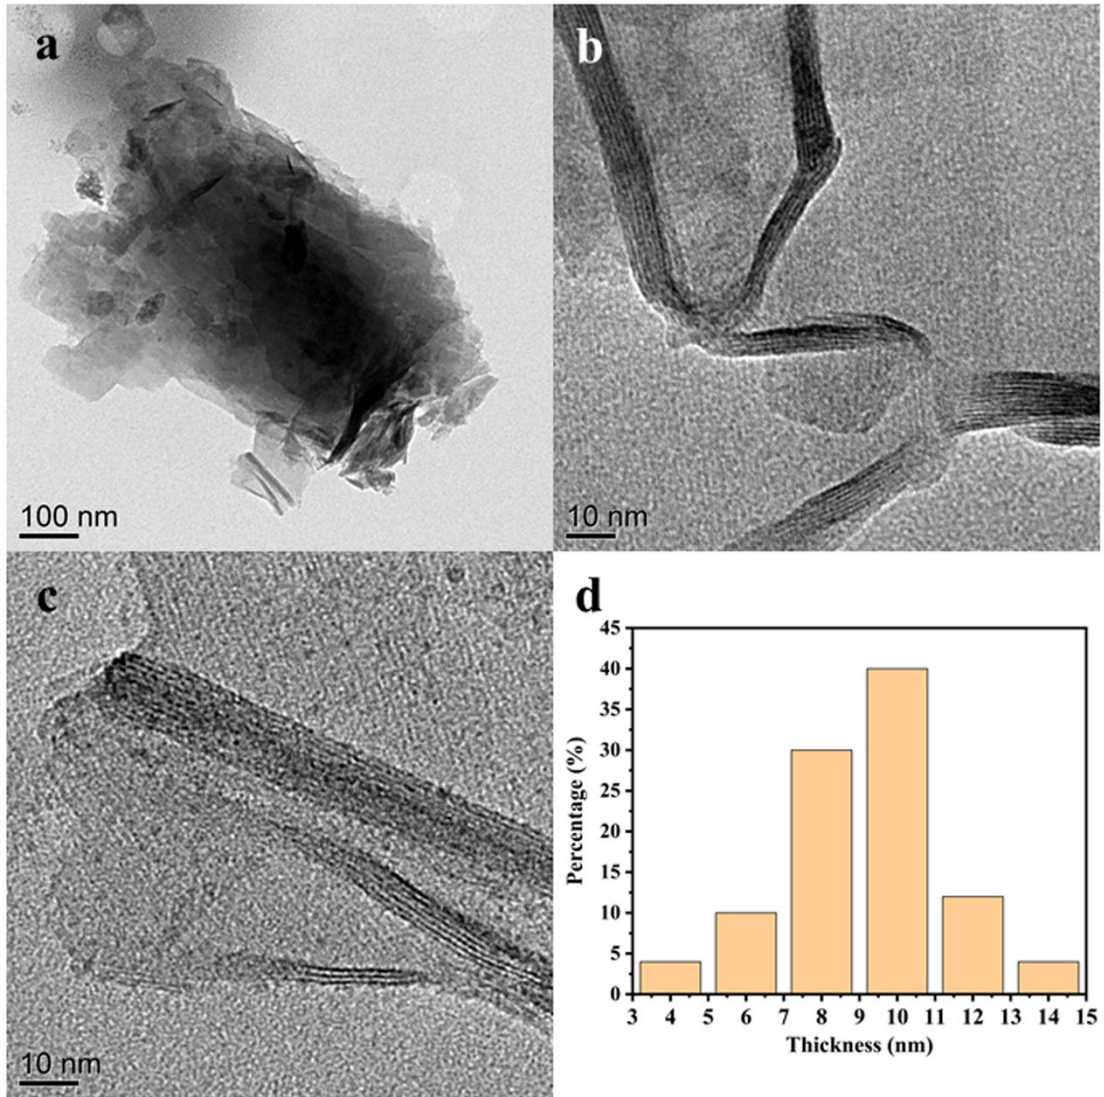

Fig. S2 Typical TEM images of (a, b, c) and the thickness distribution of MoNb-10 nanosheets

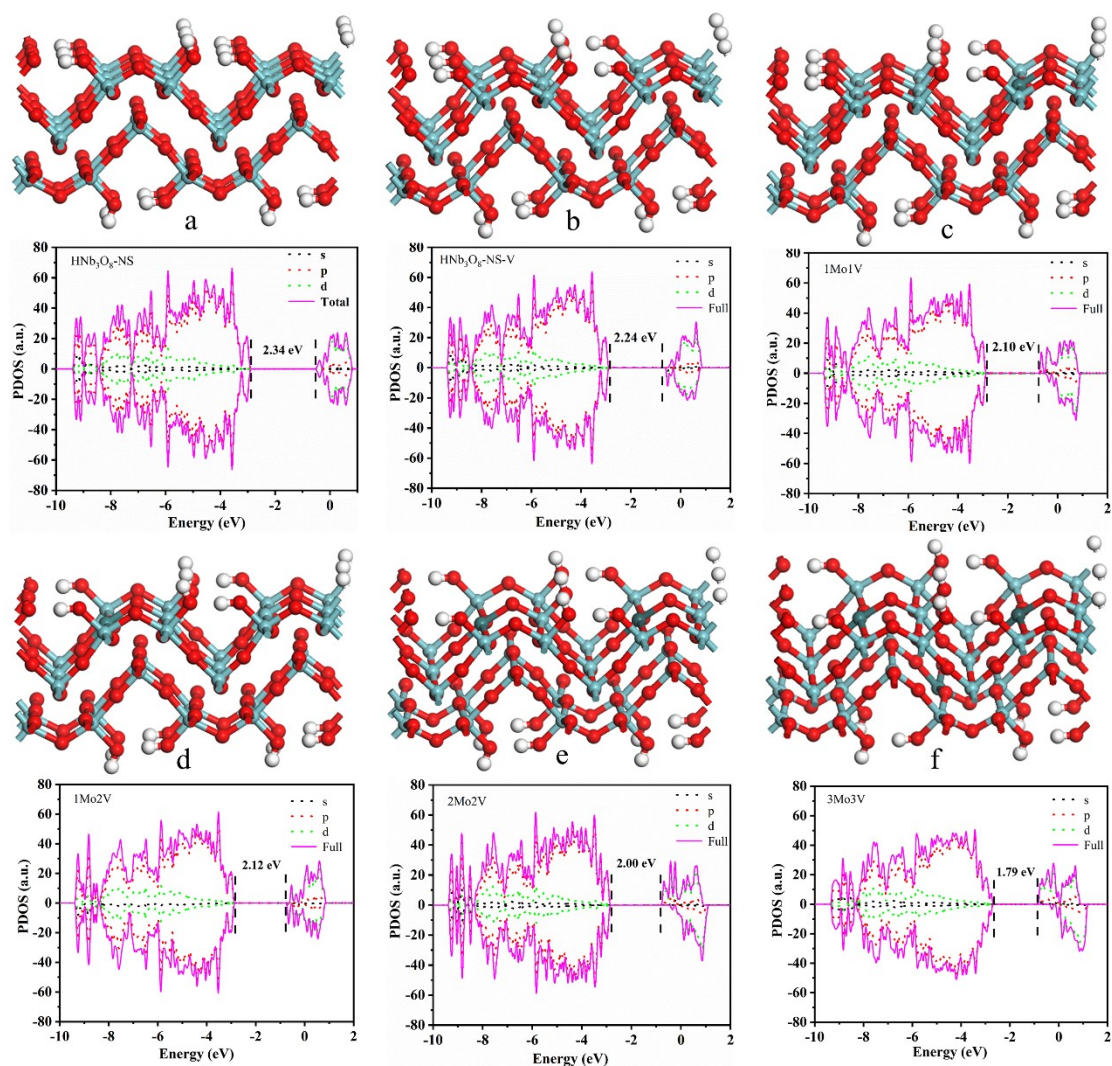

Fig. S3 The optimized configurations and the corresponding projected densities of states (PDOS) of the  $\text{HNb}_3\text{O}_8$  nanosheet (a),  $\text{HNb}_3\text{O}_8$ -NS with oxygen vacancies ( $\text{HNb}_3\text{O}_8$ -NS-V, b), and Mo-doped  $\text{HNb}_3\text{O}_8$ -NS.



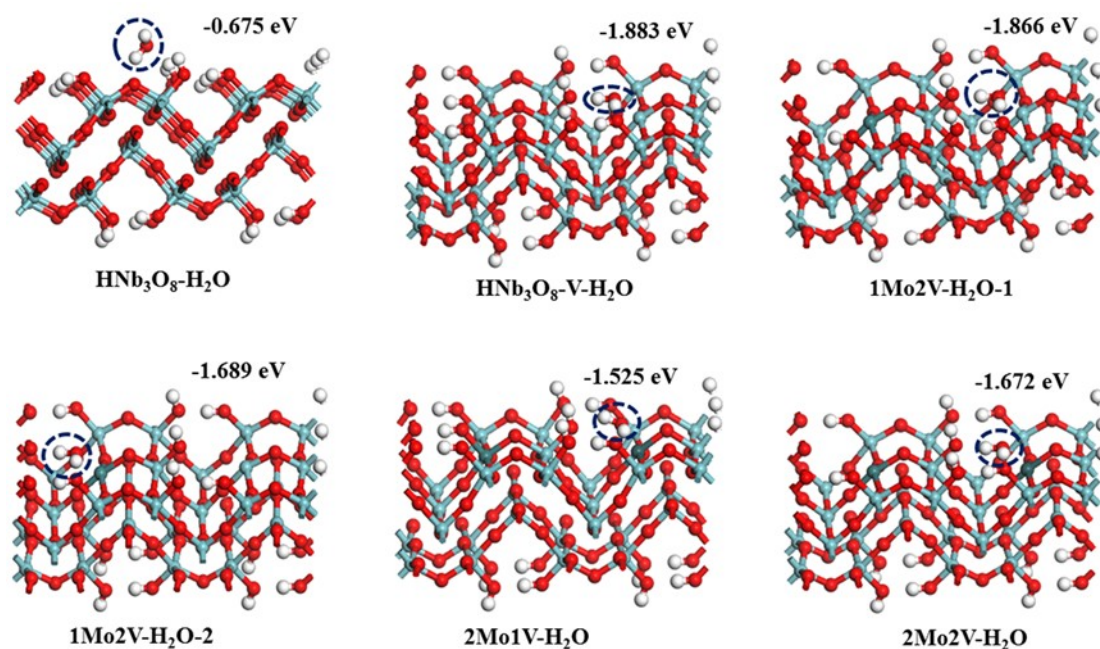

Fig. S4 The optimized adsorption configurations of  $\text{H}_2\text{O}$  on  $\text{HNb}_3\text{O}_8$  nanosheet and Mo-doped samples.

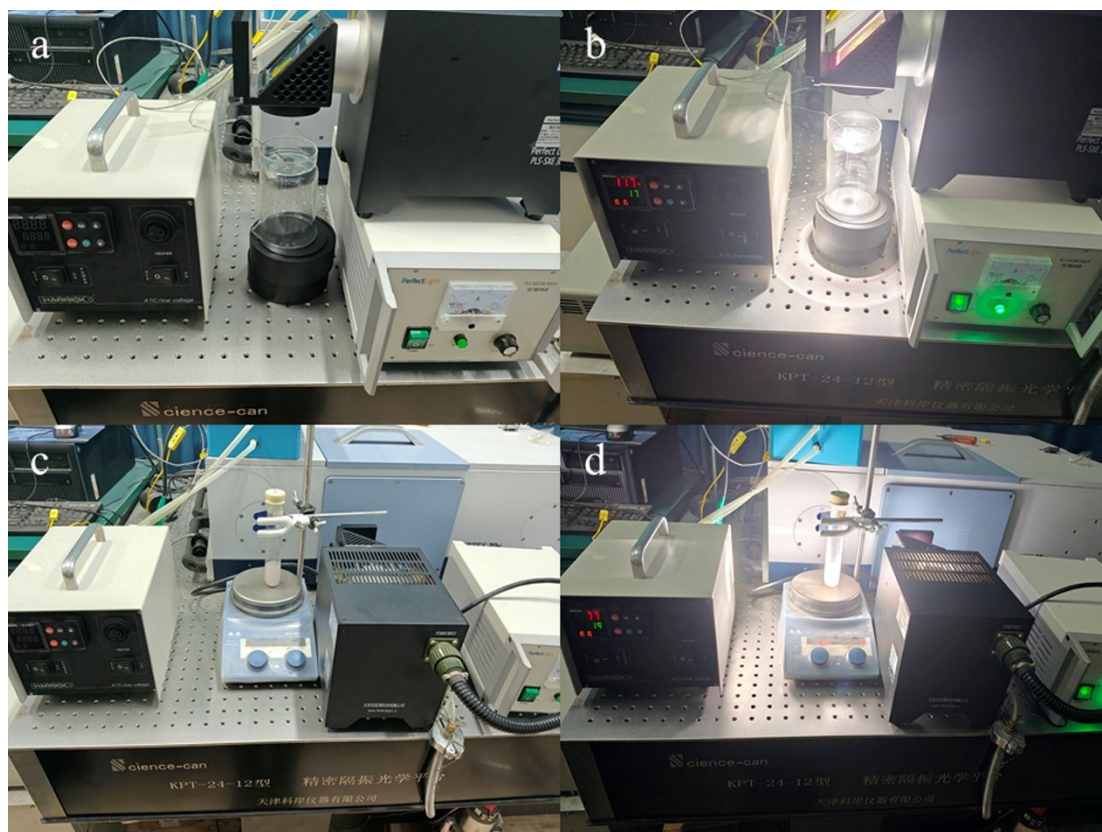

Fig. S5 The home-made equipment for measuring the temperature of the surface of catalysts and the solutions under Xe lamp irradiation.

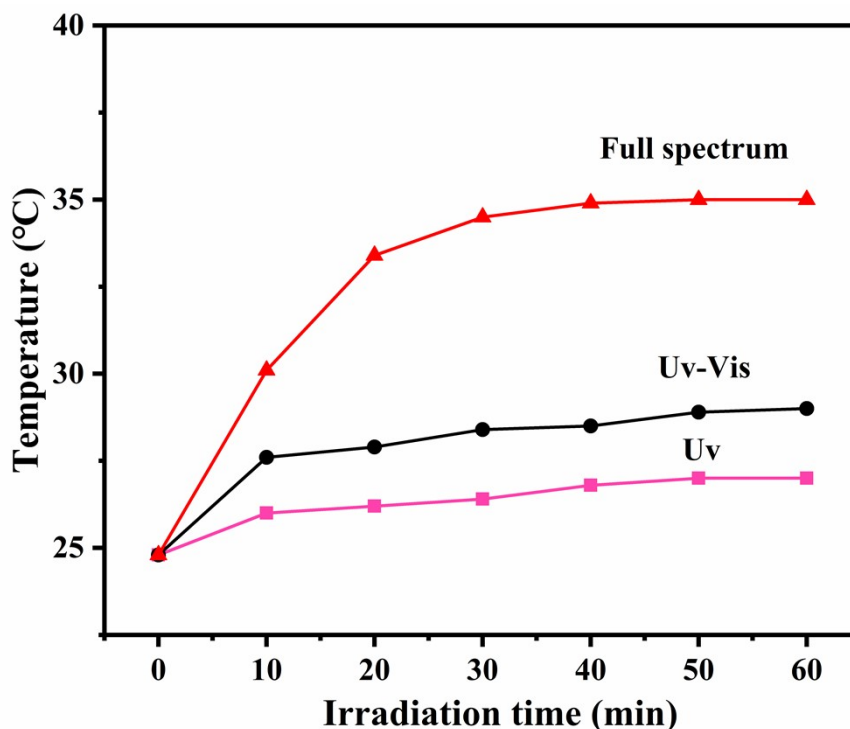

Fig. S6 Temperature evolution of the blank solution under Uv (300 - 400 nm), Uv-vis (300 – 780 nm) and full spectrum irradiation.

## Reference

- [1] Y. Zhou, T. Wen, W. Kong, B. Yang, Y. Wang, The impact of nitrogen doping and reduced-niobium self-doping on the photocatalytic activity of ultra-thin  $\text{Nb}_3\text{O}_8^-$  nanosheets, Dalton Trans. 46 (2017) 13854-13861.
- [2] N. Belmokhtar, R. Brahimi, R. Nedjar, M. Trari, Preparation and physical properties of the layered niobate  $\text{Cu}_{0.5}\text{Nb}_3\text{O}_8$ : Application to photocatalytic hydrogen evolution, Mater. Sci. Semicon. Proc. 39 (2015) 433-440.
- [3] J. Xiong, Y. Liu, S. Liang, S. Zhang, Y. Li, L. Wu, Insights into the role of Cu in promoting photocatalytic hydrogen production over ultrathin  $\text{HNb}_3\text{O}_8$  nanosheets, J. Catal. 342 (2016) 98-104.
- [4] Y. Liu, J. Xiong, Y. Yang, S. Luo, S. Zhang, Y. Li, S. Liang, L. Wu,  $\text{HNb}_x\text{Ta}_{1-x}\text{WO}_6$  monolayer nanosheets solid solutions: Tunable energyband structures and highly enhanced photocatalytic performances for hydrogen evolution, Appl. Catal. B Environ. 203 (2017) 798-806.
- [5] K. Nakagawa, T. Jia, W. Zheng, S.M. Fairclough, M. Katoh, S. Sugiyama, S.C. Tsang, Enhanced photocatalytic hydrogen evolution from water by niobate single molecular sheets and ensembles, Chem. Commun. (Camb) 50 (2014) 13702-5.
- [6] J. Xiong, L. Wen, F. Jiang, Y. Liu, S. Liang, L. Wu, Ultrathin  $\text{HNb}_3\text{O}_8$  nanosheet: An efficient photocatalyst for the hydrogen production, J. Mater. Chem. A 3 (2015) 20627-20632.
- [7] Y. Zhao, J. Li, C. Lin, Y. Qiu, Y. Yang, X. Wang, F. Pan, L. Wang, J. Lin, J. Sun, One-pot synthesis of Cu-modified  $\text{HNb}_3\text{O}_8$  nanobelts with enhanced photocatalytic hydrogen production, J. Mater. Chem. A 6 (2018) 10769-10775.



- [8] Y. Yang, J. Xiong, Y. Song, J. Zou, L. Wu, Preparation of monolayer  $\text{HSr}_2\text{Nb}_3\text{O}_{10}$  nanosheets for photocatalytic hydrogen evolution, *Dalton Trans.* 48 (2019) 11136-11141.
- [9] M.-Q. Yang, L. Shen, Y. Lu, S.W. Chee, X. Lu, X. Chi, Z. Chen, Q.-H. Xu, U. Mirsaidov, G.W. Ho, Disorder Engineering in Monolayer Nanosheets Enabling Photothermic Catalysis for Full Solar Spectrum (250–2500 nm) Harvesting, *Angew. Chem. Int. Ed.* 58 (2019) 3077 - 3081.
